# Supplementary material for: Hybrid covalent adaptable networks from cross-reactive poly(ε-caprolactone) and poly(ethylene oxide) stars towards advanced shape-memory materials
Source: Royal Society of Chemistry journal article supplement (doi:10.1039/d1ma00595b), 2021-01-01
Supplement: d1ma00595b1.pdf [file d1ma00595b1.pdf]

# Hybrid covalent adaptable networks from cross-reactive poly( $\epsilon$ -caprolactone) and poly(ethylene-oxide) stars towards advanced shape-memory materials.

*Jérémie Caprassé, Raphaël Riva, Jean-Michel Thomassin, Christine Jérôme\**

*CERM, University of Liège, CESAM-RU, Allée du Six Août, 13, 4000 Liège, Belgium.*

## Supporting information

### **Synthesis of PCL-4OH (4000g/mol)**

0,63g of pentaerythritol were transferred into a washed and dried round bottom flask and three azeotropic distillation, with dry toluene, were realized. 20mL of  $\epsilon$ -caprolactone (CL), previously distilled, were added into the pentaerythritol flask under  $N_2$ . The blend is then heated to 155°C in order to dissolve the pentaerythritol into the CL. The reactive medium is cooled down to 110°C and 20mL of tin(II) 2-ethylhexanoate 0,26M were added. The monomer conversion is followed by NMR  $^1H$  and after 3h, the polymer is recovered by precipitation into heptane.

$^1H$  NMR ( $CDCl_3$ ,  $\delta$ ): 3,97 (t, 92H,  $-CH_2-O-C(O)-$ ); 3,53 (t, 8H,  $-CH_2-OH$ ); 2,22 (t, 92H,  $-O-C(O)-CH_2-$ ); 1,56 (m, 190H,  $-C(O)-CH_2-CH_2-CH_2-CH_2-CH_2-O-$ ); 1,30 (m, 96H,  $-C(O)-CH_2-CH_2-CH_2-CH_2-CH_2-O-$ ). Quantitative conversion.

### **Synthesis of PCL-4COOH (8000g/mol)**

50 g (25 mmol of hydroxyl function) of PCL-4OH were transferred into a previously dried round bottom flask and three azeotropic distillations with anhydrous toluene were carried out. Then, 200 mL of anhydrous DMF were added to the flask through a rubber septum

with a flamed stain-less steel capillary. After complete solubilization, 2.75 g (27.5 mmol) of succinic anhydride and 3.9 mL (27.5 mmol) of triethylamine were successively added to the polymer solution. The solution was then stirred at 45°C overnight and the PCL-4COOH was successively precipitated in diethyl ether and methanol. A white powder is collected after filtration and drying under vacuum.

$^1\text{H NMR}$  ( $\text{CDCl}_3$ ,  $\delta$ ): 4,05 (t, 168H, H A + A'), 2,64 (s, 16H, H a + a'), 2,3 (t, 158H, H E), 1,64 (m, 316H, H B + D), 1,37 (m, 158H, H C). Functionalization: > 95%.

### Synthesis of PCL-4MAL (8000g/mol)

20 g (9.5 mmol of carboxylic acid functions) of PCL-4COOH were transferred into a glass reactor previously dried. 80 ml of anhydrous  $\text{CH}_2\text{Cl}_2$  were transferred to the reactor through a rubber septum using a flamed stainless-steel capillary. After the complete solubilization of the PCL, 2.3 g (11 mmol) of 4-(2-hydroxyethyl)-10-oxa-4-aza-tricyclo[5.2.1.0]dec-8-ene-3,5-dione, 2.27 g (11 mmol) of DCC and 0.134 g (1.1 mmol) of DMAP were transferred inside the reactor. After one night of reaction at room temperature the blend was filtrated in order to remove the DCU. The protected PCL-4MAL was recovered by precipitation in diethyl ether and in methanol, filtered and dried under vacuum. The polymer was then transferred into a glass reactor and heated at 105 ° C under vacuum for 6 h to eliminate furan and regenerate the maleimide functions. PCL-4MAL was kept at room temperature. The functionalization was determined by  $^1\text{H NMR}$ . The functional PCL was also characterized by SEC.

$^1\text{H NMR}$  ( $\text{CDCl}_3$ ,  $\delta$ ): 6,53 (s, 7,9H,  $\text{H}_{\text{MAL}}$ ); 4,26 (t, 7,5H,  $\text{H}_{\text{MAL}}$ ); 4,07 (t, 172H,  $-\text{CH}_2-\text{O}-\text{C}(\text{O})-$ ); 3,76 (t, 7,5H,  $\text{H}_{\text{MAL}}$ ); 2,59 (s, 16H,  $\text{O}-\text{C}(\text{O})-\text{CH}_2-\text{CH}_2-\text{C}(\text{O})-\text{O}-\text{MAL}$ ); 2,3 (t, 168H,  $-\text{O}-\text{C}(\text{O})-\text{CH}_2-$ ); 1,66 (m, 332H,  $-\text{C}(\text{O})-\text{CH}_2-\text{CH}_2-\text{CH}_2-\text{CH}_2-\text{CH}_2-\text{O}-$ ); 1,39 (m, 169H,  $-\text{C}(\text{O})-\text{CH}_2-\text{CH}_2-\text{CH}_2-\text{CH}_2-\text{CH}_2-\text{O}$ ).

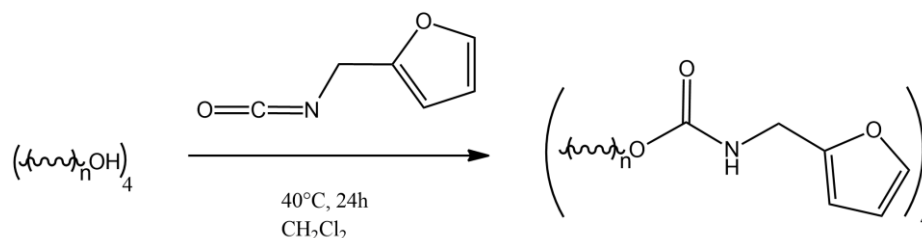

Scheme S1: Synthesis of PEO-4FUR from PEO-4OH (10.000g/mol)

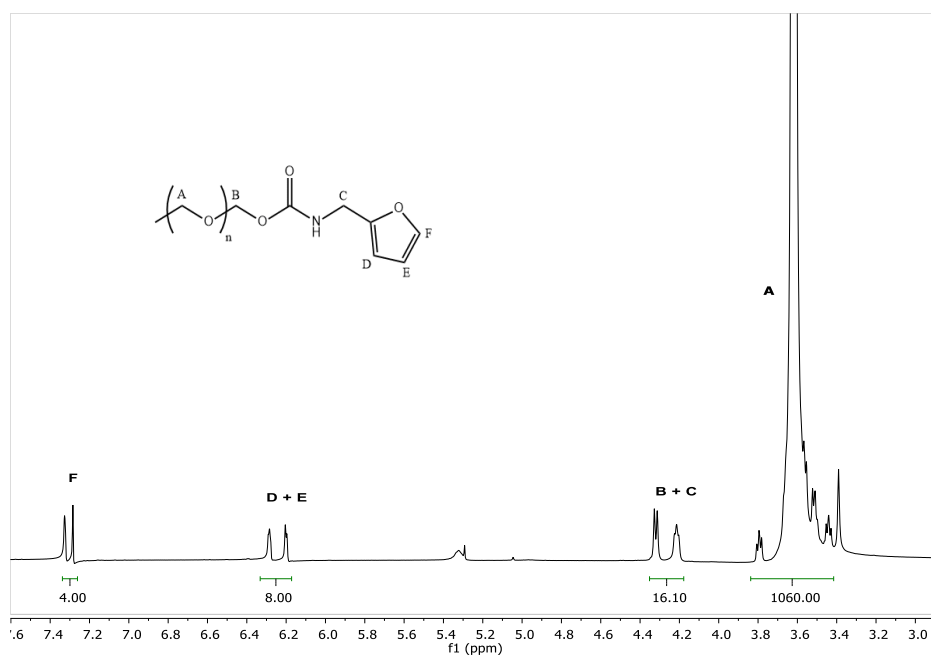

Figure S1: <sup>1</sup>H NMR spectrum of the PEO-4FUR

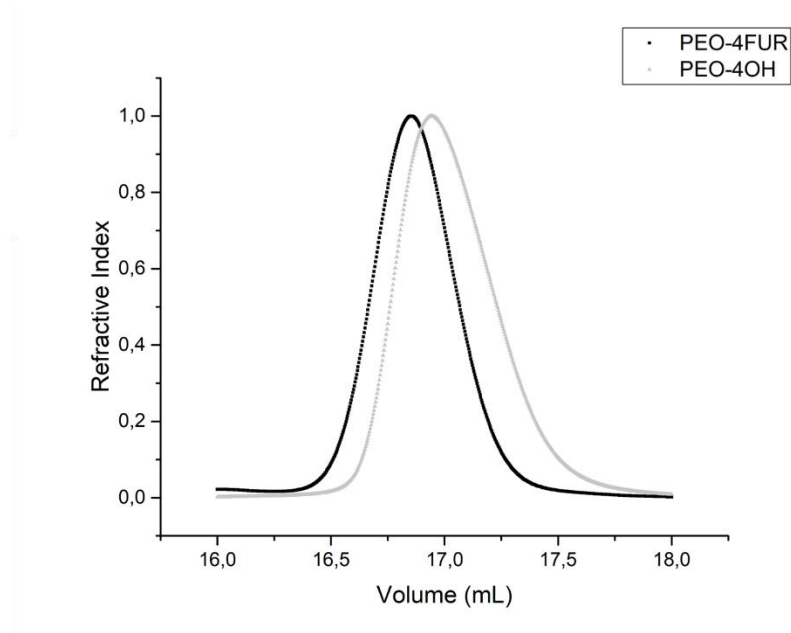

Figure S2: SEC chromatogram of the PEO-4FUR (black) and PEO-4OH (grey)

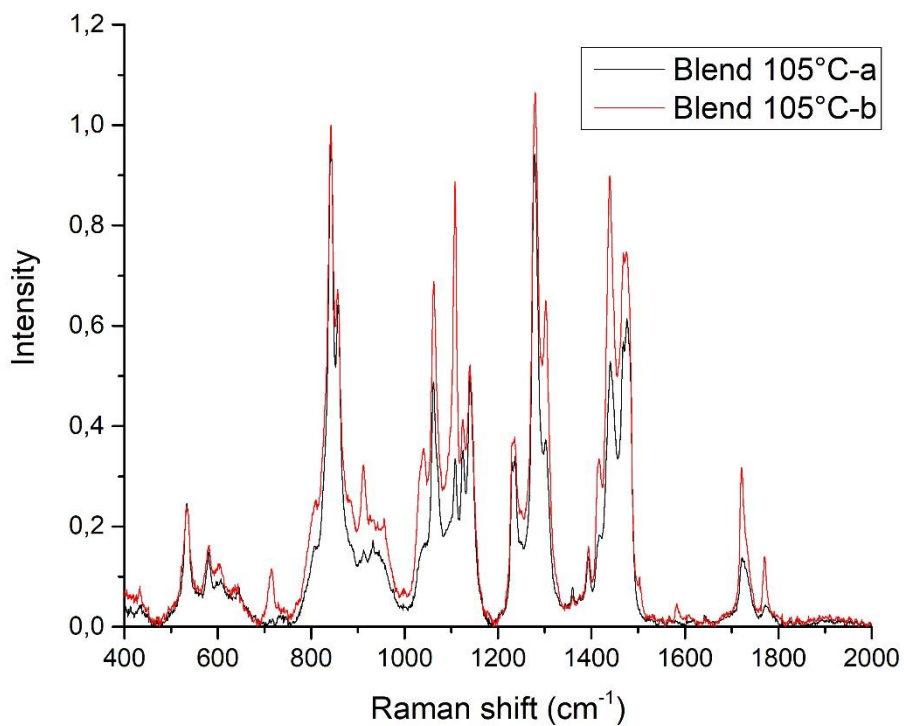

a)

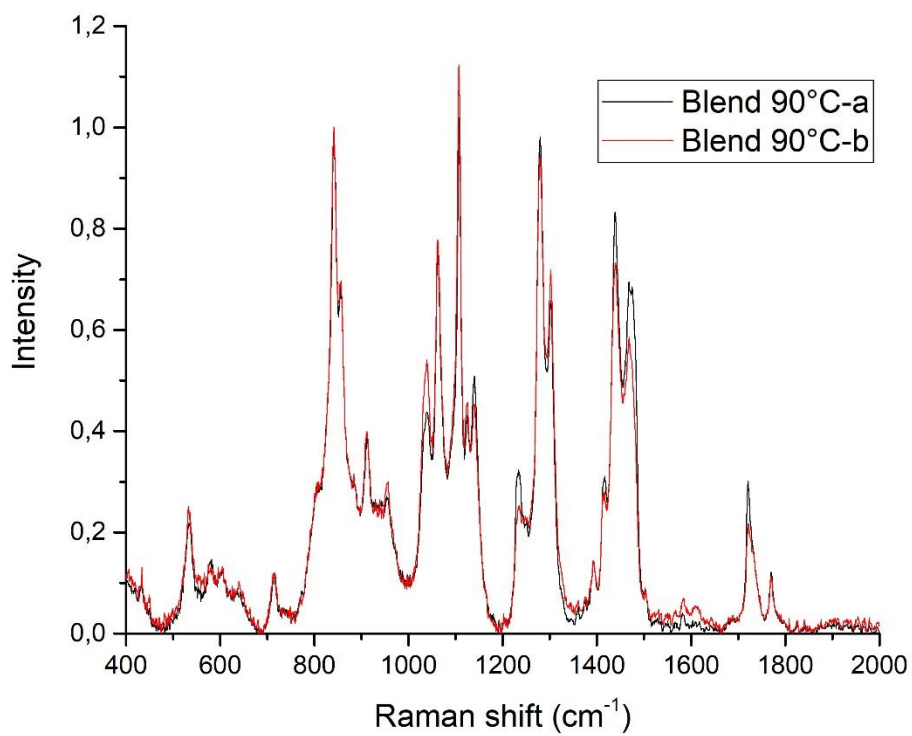

b)

Figure S3: Raman spectra on two different spots of the PEO-PCL mixture after melt blending at a) 105°C and b) 90°C (the two spots a and b giving the highest divergences over the 15 measured spectra were selected in both cases).

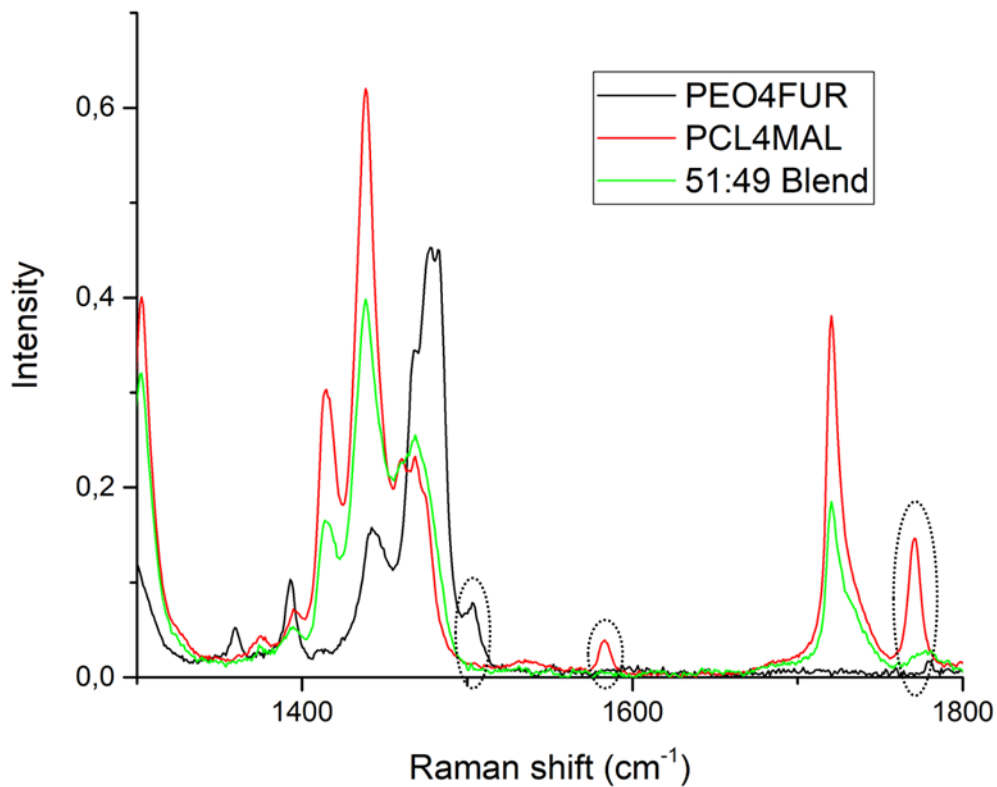

Figure S4: Raman spectra of the PEO-4FUR (black curve), PCL-4MAL (red curve) and the 51:49 blend after melt blending at 90°C and curing at 65°C for 72h (green curve). The dotted ovals highlight some bands characteristic of the furan (1503 $\text{cm}^{-1}$ ) and maleimide (1587 and 1770 $\text{cm}^{-1}$ ) end groups.

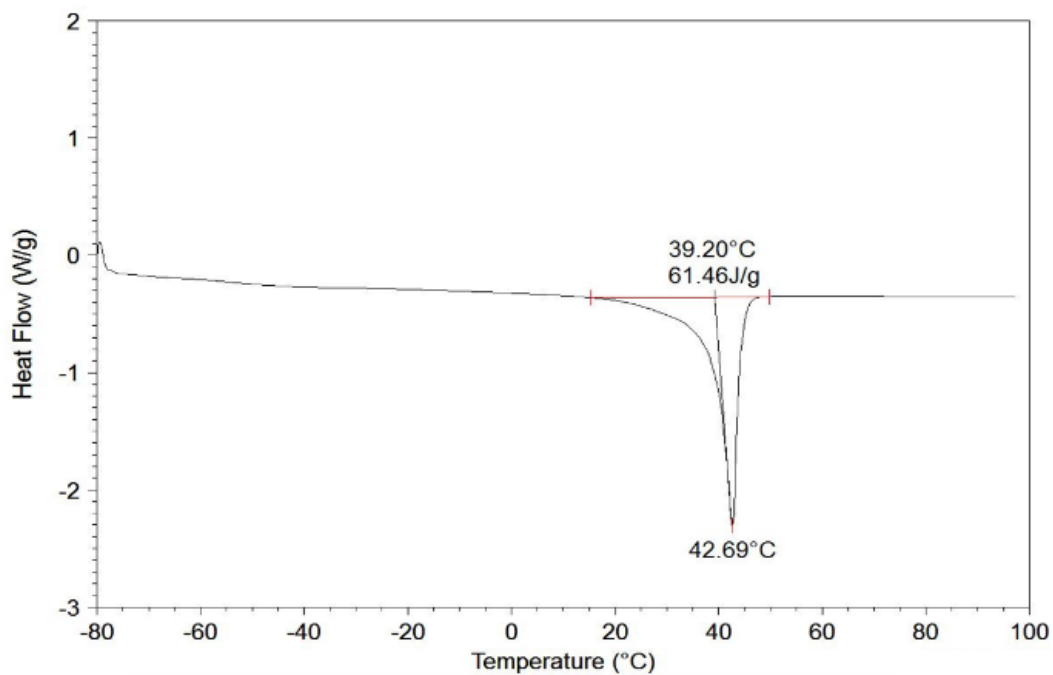

Figure S5: DSC trace for the 70:30 network.

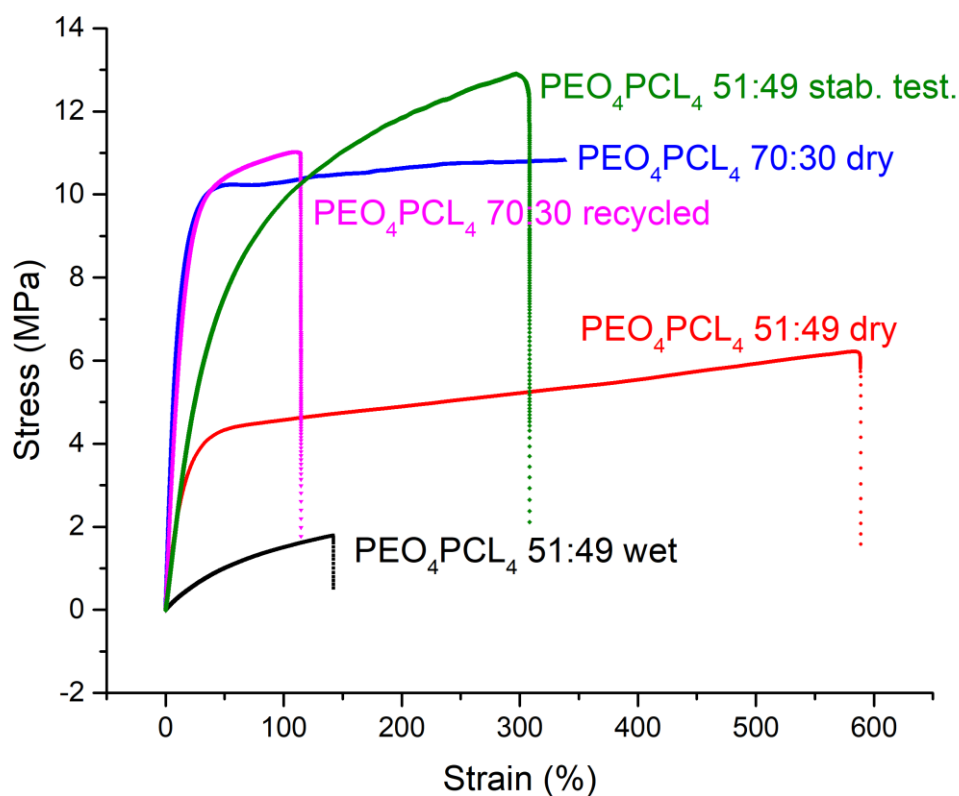

Figure S6: Stress-strain curves at room temperature of the PEO-4FUR/PCL-4MAL8k (51:49) material at the dry state (red), in the hydrated state (black) and after 2 months in PBS solution and dried (green), of PEO-4FUR/PCL-4MAL4k (70:30) material at dry state (blue) and of PEO-4FUR/PCL-4MAL recycled (pink).

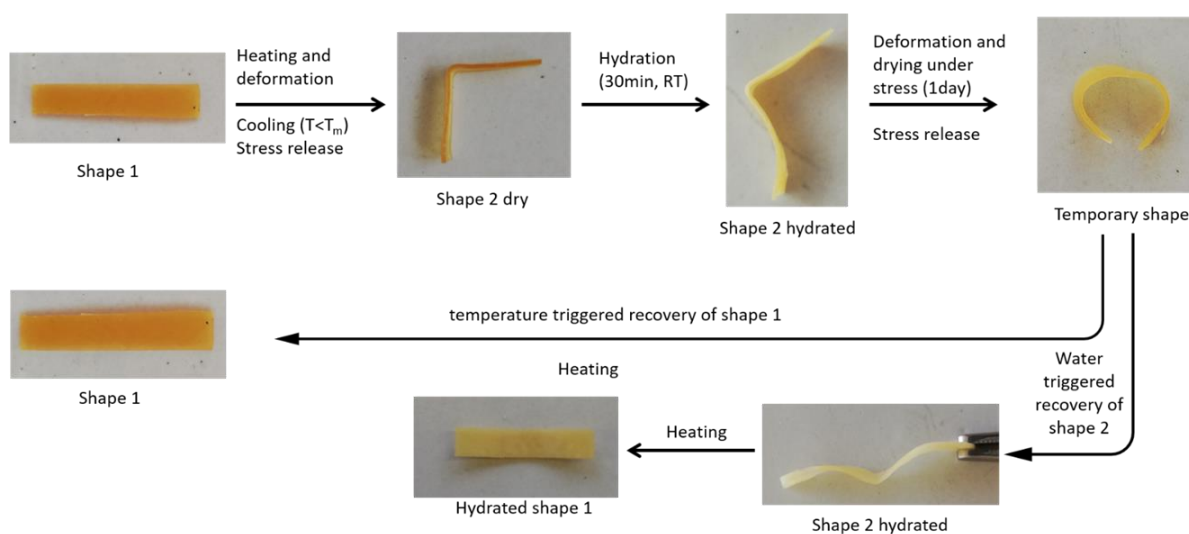

Figure S7: Multiple shape-memory of PEO/PCL network with the 51:49 composition. The temporary shape is obtained by bending the shape 2 by about 270°.

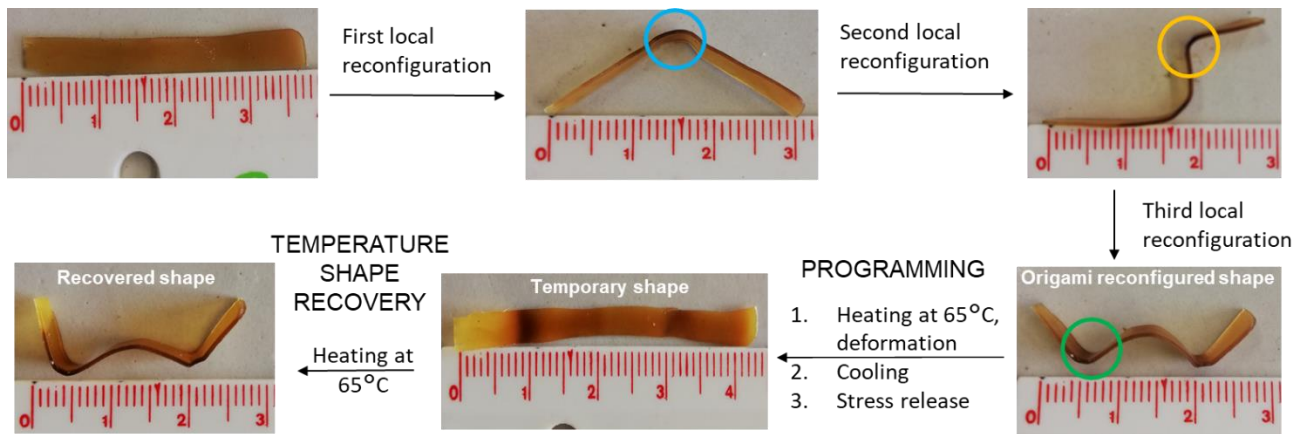

Figure S8: Origami reconfiguration by local heating of the 51:49 network followed by thermal induced shape memory cycle.

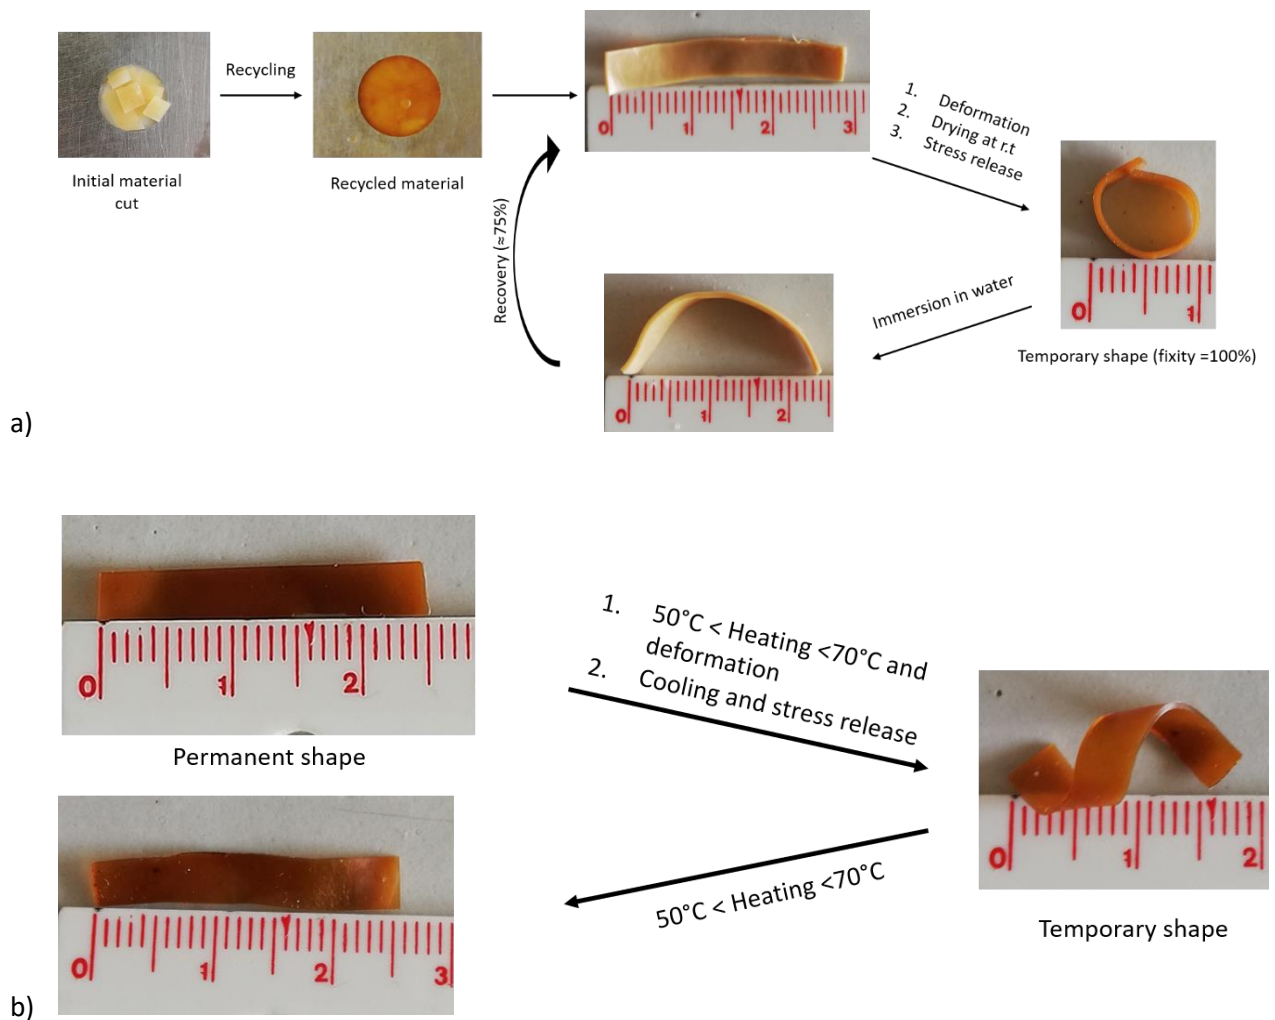

Figure S9: a) Sample before and after recycling process (method B) (left) and water shape-memory properties of the recycled 70:30 material (right). b) Thermal shape-memory properties of the recycled 70:30 material.

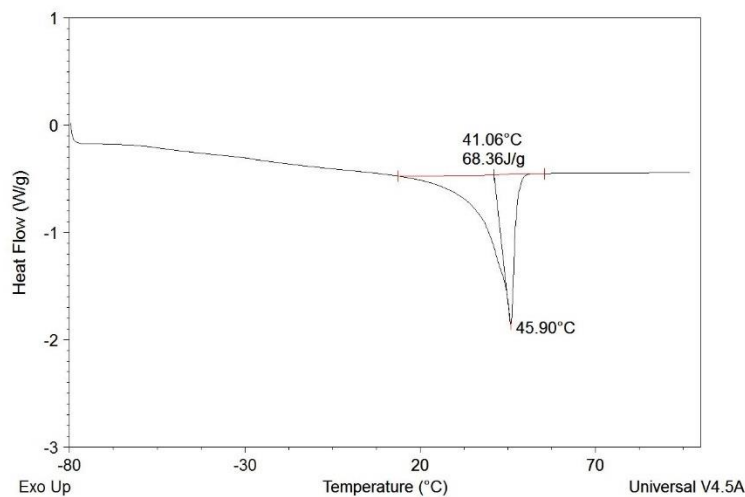

Figure S10: DSC traces for the recycled 70:30 network

Table S1: Temperature shape-memory properties of the 51:49 hybrid network as determined by DMA in the dry state.

| Cycle number       | 1  | 2  | 3  | 4  |
|--------------------|----|----|----|----|
| Fixity ratio (%)   | 98 | 98 | 98 | 98 |
| Recovery ratio (%) | 85 | 97 | 97 | 97 |

Table S2: Temperature shape-memory properties of the 51:49 network after immersion in PBS

| Immersion time \ <i>Cycle number</i> | Fixity ratio (%) |          |          |          | Recovery ratio (%) |          |          |          |
|--------------------------------------|------------------|----------|----------|----------|--------------------|----------|----------|----------|
|                                      | <i>1</i>         | <i>2</i> | <i>3</i> | <i>4</i> | <i>1</i>           | <i>2</i> | <i>3</i> | <i>4</i> |
| 2 weeks                              | 97               | 98       | 98       | 98       | 75                 | 96       | 99       | 99       |
| 1 month                              | 98               | 98       | 98       | 98       | 79                 | 97       | 97       | 97       |

Table S3: Mechanical properties at room temperature of the dry 51:49 material before and after hydrolytic test of 2 months

| Material                       | E (MPa) | $\sigma$ (MPa) | $\epsilon$ (%) |
|--------------------------------|---------|----------------|----------------|
| 51 : 49 before hydrolytic test | 31      | 6.2            | 600            |
| 51 : 49 after hydrolytic test  | 43      | 12.9           | 310            |
